# Supplementary material
Source: MDPI journal article supplement (https://www.mdpi.com/2073-4352/13/6/974)
Supplement: s1 [file s1]

## Two conformational polymorphs of a bioactive pyrazolo[3,4-d]pyrimidine

Sang Loon Tan <sup>1</sup>, Yee Seng Tan <sup>1</sup>, Jia Hui Ng <sup>2</sup>, Anton V. Dolzhenko <sup>2,3</sup>  
and Edward R. T. Tiekink <sup>1\*</sup>

<sup>1</sup> Research Centre for Crystalline Materials, School of Medical and Life Sciences, Sunway University, Bandar Sunway 47500, Selangor Darul Ehsan, Malaysia alant@sunway.edu.my (S.L.T.); yeesengt@sunway.edu.my (Y.S.T.)

<sup>2</sup> School of Pharmacy, Monash University Malaysia, Jalan Lagoon Selatan, Bandar Sunway, Selangor Darul Ehsan 47500, Malaysia  
anton.dolzhenko@monash.edu (A.V.D.)

<sup>3</sup> Curtin Medical School, Curtin Health Innovation Research Institute, Faculty of Health Sciences, Curtin University, GPO Box U1987 Perth, Western Australia 6845, Australia

\* Correspondence: edwardt@sunway.edu.my (E.R.T.T.); Tel.: +60-3-7491-7181

### \*\*\* SUPPLEMENTARY MATERIALS \*\*\*

**Figure S1.** Powder X-ray diffraction (PXRD) patterns for the  $\alpha$ - and  $\beta$ -polymorphs of **1**.

**Figure S2.** The DSC traces for the (a)  $\alpha$ - and (b)  $\beta$ -polymorphs of **1**.

**Table S1.** Unit-cell data obtained from variable-temperature measurements on a single crystal of the  $\beta$ -form of **1**.

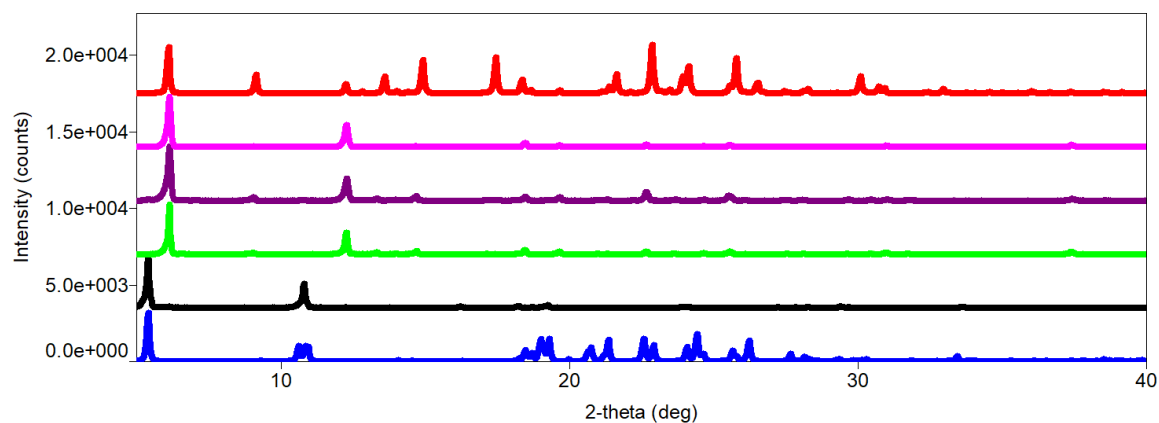

(a)

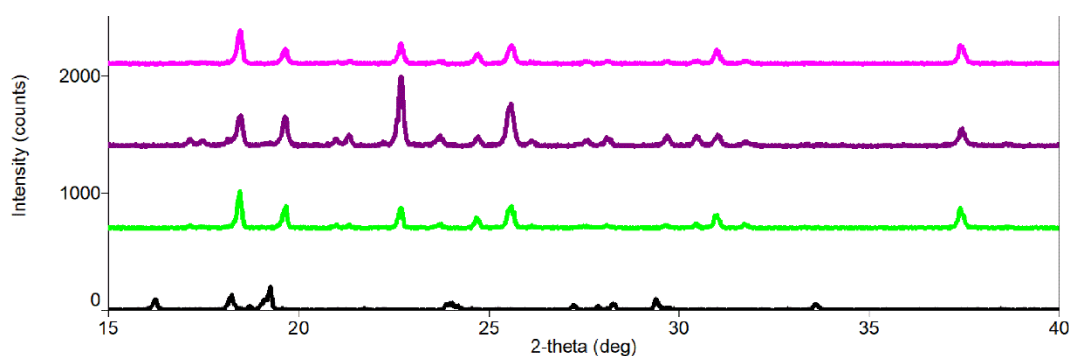

(b)

**Figure S1.** Powder X-ray diffraction (PXRD) patterns for the  $\alpha$ - and  $\beta$ -polymorphs of **1**. (a) Simulated patterns:  $\alpha$ -polymorph (blue trace) and  $\beta$ -polymorph (red). Experimental patterns:  $\alpha$ -polymorph (black trace (from MeOH)) and  $\beta$ -polymorphs (green (from EtOH), purple (nPrOH) and pink (iPrOH)). (b) Experimental patterns:  $\alpha$ -polymorph (black trace (from MeOH)) and  $\beta$ -polymorphs (green (from EtOH), purple (nPrOH) and pink (iPrOH)) plotted in the region 15 to 40° to negate the influence of the intense, low-angle peaks. The PXRD patterns were measured on a Rigaku SmartLab Powder X-ray diffractometer (Rigaku, Tokyo, Japan) using CuK $\alpha$  ( $\lambda$  = 1.5418 Å) radiation in the 2 $\theta$  range of 5 to 40° (step size = 0.01°).

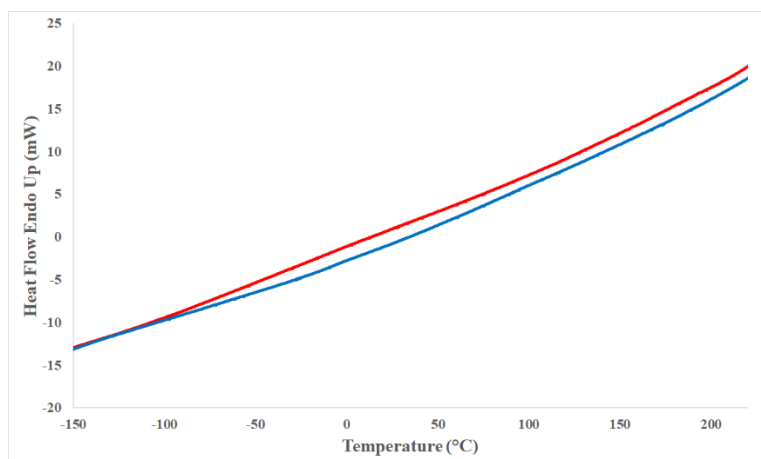

(a)

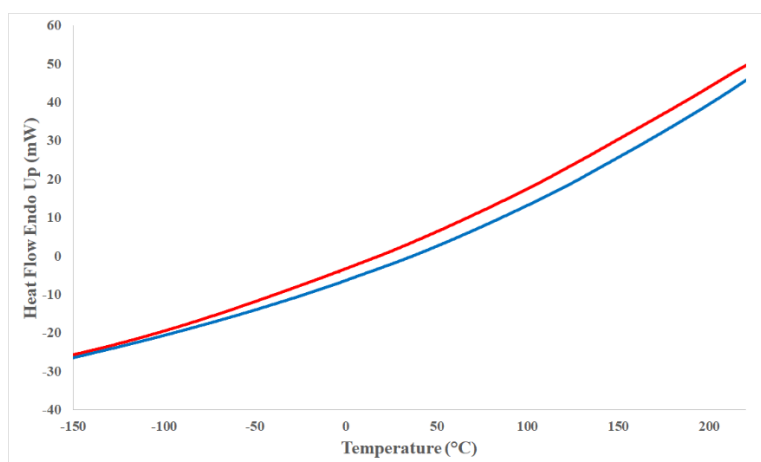

(b)

**Figure S2.** The DSC traces for the (a)  $\alpha$ - and (b)  $\beta$ -polymorphs of **1**. Each polymorph was heated to 220 °C from -150 °C followed by cooling. The red trace is the heating cycle and the blue trace, the cooling cycle.

**Table S1.** Unit-cell data obtained from variable-temperature measurements on a single crystal of the  $\beta$ -form of **1**. Experiments were performed on a Rigaku/Oxford Diffraction XtaLAB Synergy diffractometer (Dualflex, AtlasS2) fitted with CuK $\alpha$  radiation ( $\lambda = 1.54184 \text{ \AA}$ ) fitted with an Oxford Cryosystem Cryostream 800.

**Cooling cycle:**

**298 K**

|                               |             |
|-------------------------------|-------------|
| _cell_length_a                | 14.4148(4)  |
| _cell_length_b                | 13.2814(4)  |
| _cell_length_c                | 8.22721(19) |
| _cell_angle_alpha             | 90.0        |
| _cell_angle_beta              | 91.535(2)   |
| _cell_angle_gamma             | 90.0        |
| _cell_volume                  | 1574.52(8)  |
| _cell_formula_units_Z         | 4.00        |
| _cell_measurement_temperature | 297.99(10)  |

**200 K**

|                               |              |
|-------------------------------|--------------|
| _cell_length_a                | 14.42119(13) |
| _cell_length_b                | 13.14149(15) |
| _cell_length_c                | 8.17706(7)   |
| _cell_angle_alpha             | 90.0         |
| _cell_angle_beta              | 91.9418(7)   |
| _cell_angle_gamma             | 90.0         |
| _cell_volume                  | 1548.79(3)   |
| _cell_formula_units_Z         | 4.00         |
| _cell_measurement_temperature | 200.00(10)   |

**100 K**

|                               |              |
|-------------------------------|--------------|
| _cell_length_a                | 14.43918(13) |
| _cell_length_b                | 13.01799(13) |
| _cell_length_c                | 8.12972(6)   |
| _cell_angle_alpha             | 90.0         |
| _cell_angle_beta              | 92.3447(8)   |
| _cell_angle_gamma             | 90.0         |
| _cell_volume                  | 1526.86(2)   |
| _cell_formula_units_Z         | 4.00         |
| _cell_measurement_temperature | 99.97(13)    |

**Heating cycle:**

**200 K**

|                               |              |
|-------------------------------|--------------|
| _cell_length_a                | 14.42154(14) |
| _cell_length_b                | 13.13925(16) |
| _cell_length_c                | 8.17439(7)   |
| _cell_angle_alpha             | 90.0         |
| _cell_angle_beta              | 91.9377(8)   |
| _cell_angle_gamma             | 90.0         |
| _cell_volume                  | 1548.07(3)   |
| _cell_formula_units_Z         | 4.00         |
| _cell_measurement_temperature | 200.00(10)   |

**298 K**

|                               |             |
|-------------------------------|-------------|
| _cell_length_a                | 14.4093(2)  |
| _cell_length_b                | 13.2816(2)  |
| _cell_length_c                | 8.22455(10) |
| _cell_angle_alpha             | 90.0        |
| _cell_angle_beta              | 91.5168(11) |
| _cell_angle_gamma             | 90.0        |
| _cell_volume                  | 1573.45(4)  |
| _cell_formula_units_Z         | 4.00        |
| _cell_measurement_temperature | 297.99(11)  |

**350 K**

|                               |             |
|-------------------------------|-------------|
| _cell_length_a                | 14.4034(2)  |
| _cell_length_b                | 13.3628(2)  |
| _cell_length_c                | 8.25698(10) |
| _cell_angle_alpha             | 90.0        |
| _cell_angle_beta              | 91.2756(13) |
| _cell_angle_gamma             | 90.0        |
| _cell_volume                  | 1588.82(4)  |
| _cell_formula_units_Z         | 4.00        |
| _cell_measurement_temperature | 350.00(13)  |

**373 K**

|                               |             |
|-------------------------------|-------------|
| _cell_length_a                | 14.3995(2)  |
| _cell_length_b                | 13.4020(3)  |
| _cell_length_c                | 8.27388(11) |
| _cell_angle_alpha             | 90.0        |
| _cell_angle_beta              | 91.1560(13) |
| _cell_angle_gamma             | 90.0        |
| _cell_volume                  | 1596.39(5)  |
| _cell_formula_units_Z         | 4.00        |
| _cell_measurement_temperature | 372.99(16)  |
